# Supplementary material for: Recombination rates in pigs differ between breeds, sexes and individuals, and are associated with the RNF212, SYCP2, PRDM7, MEI1 and MSH4 loci
Source: PubMed Central journal article supplement (PMC9123673; doi:10.1186/s12711-022-00723-9), 2022-05-20

Distribution of crossover counts per gamet

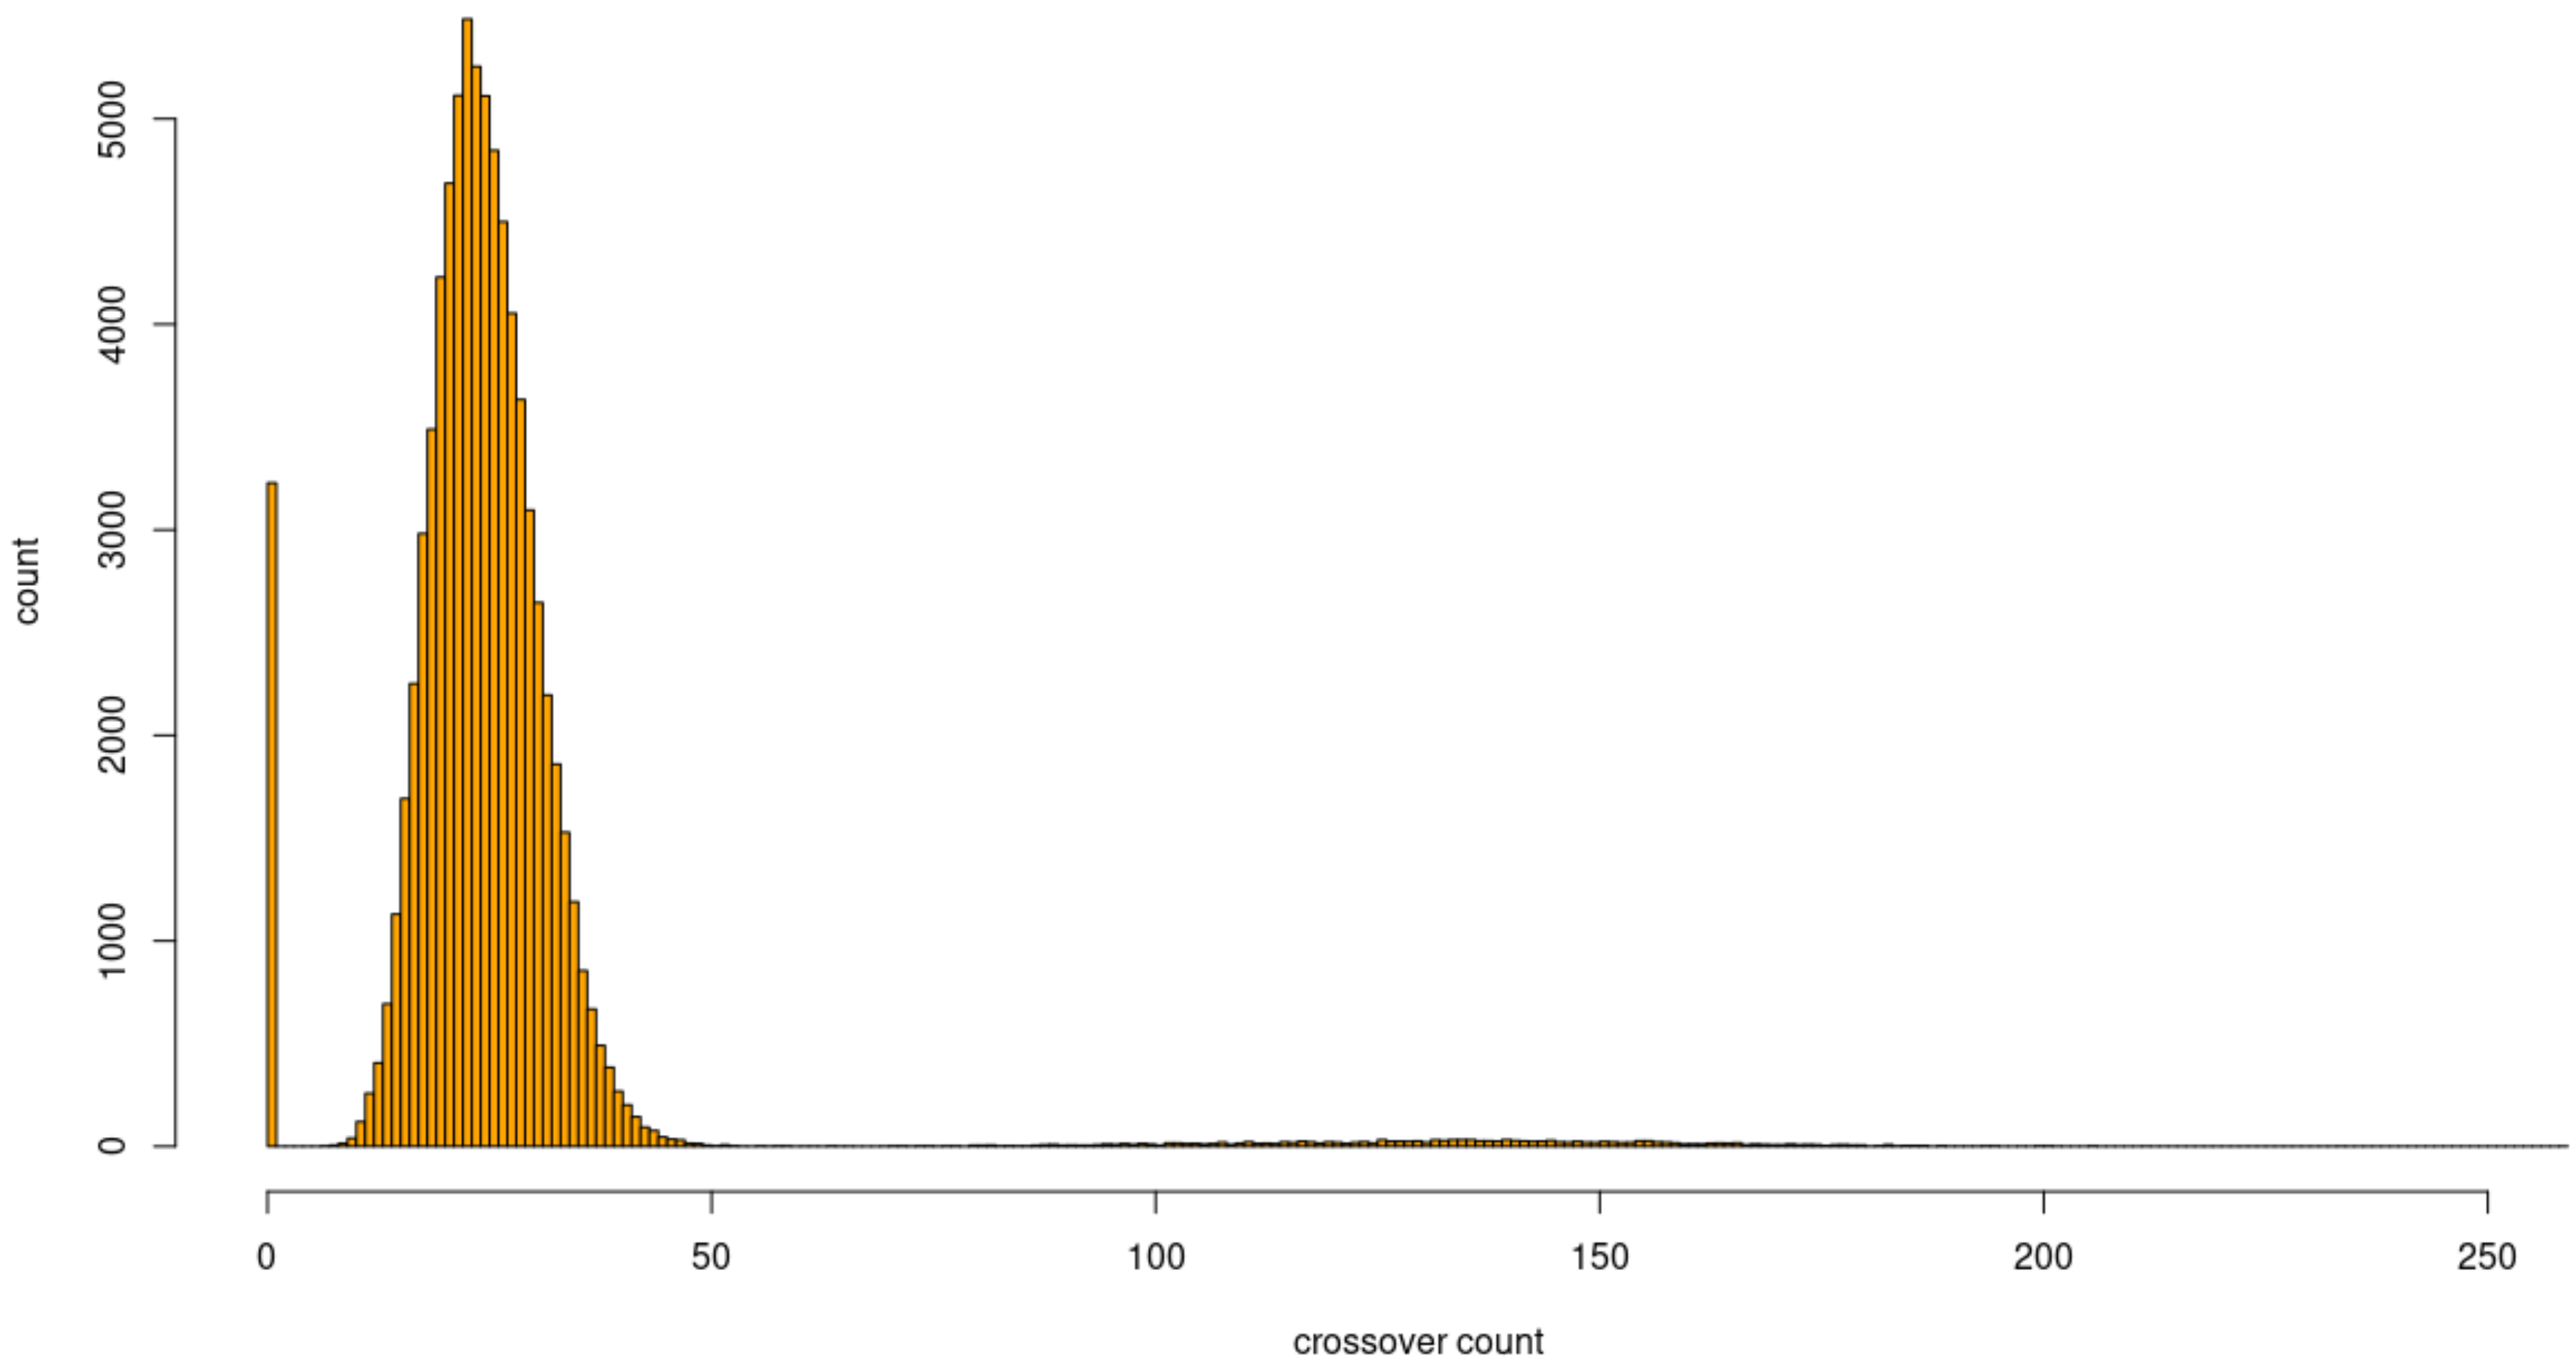

Supplement: 12711_2022_723_MOESM1_ESM.pdf [file 12711_2022_723_MOESM1_ESM.pdf]
